# Supplementary material for: The Use of Online Health Forums by Patients With Chronic Cough: Qualitative Study
Source: PubMed Central journal article supplement (PMC5803533; doi:10.2196/jmir.7975), 2018-01-24
Supplement: jmir_v20i1e19_app1.pdf [file jmir_v20i1e19_app1.pdf]

| Inclusion Criteria                                                                                                                                 | Exclusion Criteria                                                                    |
|----------------------------------------------------------------------------------------------------------------------------------------------------|---------------------------------------------------------------------------------------|
| Thread contained within a selected Online health forum                                                                                             | Symptoms such as hemoptysis which suggest a more serious diagnosis than chronic cough |
| Original thread post specifies a cough of greater than 8 weeks' duration in accordance with the British Thoracic Society guidance on Chronic Cough | No specification of the length of cough symptom or a duration of less than 8 weeks    |
| Forum text is posted in English Language                                                                                                           | Forum Text posted in a Non-English Language                                           |

Table 1. Summary of inclusion & Exclusion criteria for online forum threads

| Main Theme                         | Associated Subthemes                      |
|------------------------------------|-------------------------------------------|
| <b>The Impact of Chronic Cough</b> | Physical impacts                          |
|                                    | Psychological impacts                     |
|                                    | Social impacts                            |
| <b>Lay Knowledge</b>               | Biomedical and Prescribed drug treatments |
|                                    | Home remedies                             |
|                                    | Lay referral                              |
| <b>Social Support</b>              |                                           |

Table 2. Summary of Themes and sub-themes discussed.
